# Supplementary material for: Thermal effects on the dynamics and motor control of ballistic prey capture in toads: maintaining high performance at low temperature
Source: Oxford University Press journal article supplement (doi:10.1242/jeb.048405), 2011-03-23
Supplement: jeb048405tabless1-s2.pdf [file jeb048405tabless1-s2.pdf]

Table S1. Results of ANCOVA examining effects on kinematic, dynamic and electromyographic variables over the 11-25°C range in four *Bufo terrestris*. Prey distance was included as a covariate only when it showed a significant effect for that variable. Bold values with asterisks indicate significant effects at the Bonferroni-corrected alpha (0.0019 for 27 variables). Data from four individual toads were included in all analyses.

|                                                          | Individual |         |      |                    | Temperature |         |      |                    | Prey Distance |         |      |                    |
|----------------------------------------------------------|------------|---------|------|--------------------|-------------|---------|------|--------------------|---------------|---------|------|--------------------|
|                                                          | # Trials   | F-ratio | df   | P-value            | # Trials    | F-ratio | df   | P-value            | # Trials      | F-ratio | df   | P-value            |
| <b>Kinematic variables</b>                               |            |         |      |                    |             |         |      |                    |               |         |      |                    |
| Duration of ballistic mouth opening                      | 56         | 0.481   | 3,51 | 0.6973             | 56          | 2.192   | 1,51 | 0.1449             | 35            | 2.689   | 1,29 | 0.1119             |
| Duration of tongue projection                            | 55         | 4.947   | 3,50 | 0.0044             | 55          | 1.969   | 1,50 | 0.1668             | 35            | 0.844   | 1,29 | 0.3659             |
| Gape distance at end of ballistic opening                | 31         | 6.485   | 3,26 | 0.0020             | 31          | 0.028   | 1,26 | 0.8688             | 28            | 7.712   | 1,22 | 0.0110             |
| Maximum tongue reach                                     | 34         | 4.037   | 3,28 | 0.0167             | 34          | 2.232   | 1,28 | 0.1464             | 34            | 40.302  | 1,28 | <b>&lt;0.0001*</b> |
| Duration of mouth opening during transport               | 56         | 0.725   | 3,51 | 0.5418             | 56          | 15.203  | 1,51 | <b>0.0003*</b>     | 35            | 0.203   | 1,29 | 0.6559             |
| Final gape distance                                      | 34         | 19.786  | 3,29 | <b>&lt;0.0001*</b> | 34          | 1.251   | 1,29 | 0.2725             | 34            | 8.539   | 1,28 | 0.0068             |
| Duration of tongue retraction                            | 55         | 3.369   | 3,50 | 0.0256             | 55          | 11.834  | 1,50 | <b>0.0012*</b>     | 35            | 5.004   | 1,29 | 0.0331             |
| Duration of mouth closing                                | 56         | 1.248   | 3,51 | 0.3021             | 56          | 114.627 | 1,51 | <b>&lt;0.0001*</b> | 35            | 0.342   | 1,29 | 0.5633             |
| <b>Dynamic variables</b>                                 |            |         |      |                    |             |         |      |                    |               |         |      |                    |
| Average velocity of ballistic mouth opening              | 34         | 50.055  | 3,29 | <b>&lt;0.0001*</b> | 34          | 7.157   | 1,29 | 0.0121             | 34            | 3.660   | 1,28 | 0.0660             |
| Maximum velocity of ballistic opening                    | 31         | 85.455  | 3,26 | <b>&lt;0.0001*</b> | 31          | 2.287   | 1,26 | 0.1425             | 28            | 5.683   | 1,22 | 0.0262             |
| Maximum acceleration of ballistic opening                | 31         | 34.044  | 3,26 | <b>&lt;0.0001*</b> | 31          | 0.018   | 1,26 | 0.8950             | 28            | 0.229   | 1,22 | 0.6371             |
| Maximum power of ballistic opening                       | 31         | 32.061  | 3,26 | <b>&lt;0.0001*</b> | 31          | 0.631   | 1,26 | 0.4343             | 28            | 3.782   | 1,22 | 0.0647             |
| Average velocity of tongue projection                    | 34         | 12.927  | 3,29 | <b>&lt;0.0001*</b> | 34          | 3.164   | 1,29 | 0.0857             | 34            | 1.252   | 1,28 | 0.2727             |
| Average velocity of mouth opening during transport       | 34         | 0.611   | 3,29 | 0.6133             | 34          | 35.580  | 1,29 | <b>&lt;0.0001*</b> | 34            | 3.110   | 1,28 | 0.0887             |
| Average velocity of tongue retraction                    | 34         | 2.742   | 3,28 | 0.0619             | 34          | 28.270  | 1,28 | <b>&lt;0.0001*</b> | 34            | 20.899  | 1,28 | <b>&lt;0.0001*</b> |
| Average velocity of mouth closing                        | 34         | 7.098   | 3,29 | <b>0.0010*</b>     | 34          | 122.424 | 1,29 | <b>&lt;0.0001*</b> | 34            | 0.000   | 1,28 | 0.9841             |
| <b>Electromyographic variables</b>                       |            |         |      |                    |             |         |      |                    |               |         |      |                    |
| Depressor EMG integrated area                            | 35         | 14.494  | 3,29 | <b>&lt;0.0001*</b> | 35          | 125.225 | 1,29 | <b>&lt;0.0001*</b> | 35            | 125.225 | 1,29 | <b>&lt;0.0001*</b> |
| Depressor EMG duration                                   | 52         | 18.795  | 3,47 | <b>&lt;0.0001*</b> | 52          | 244.604 | 1,47 | <b>&lt;0.0001*</b> | 35            | 2.245   | 1,29 | 0.1449             |
| Depressor EMG RMS                                        | 52         | 5.189   | 3,47 | 0.0035             | 52          | 5.328   | 1,47 | 0.0254             | 35            | 8.836   | 1,29 | 0.0059             |
| Depressor EMG integrated area/duration                   | 52         | 1.676   | 3,47 | 0.1850             | 52          | 1.979   | 1,47 | 0.1661             | 35            | 10.332  | 1,29 | 0.0032             |
| Depressor EMG RMS max. amplitude                         | 52         | 0.427   | 3,47 | 0.7349             | 52          | 2.400   | 1,47 | 0.1280             | 35            | 4.014   | 1,29 | 0.0545             |
| Levator EMG (second burst) RMS max. amplitude            | 53         | 29.468  | 3,48 | <b>&lt;0.0001*</b> | 53          | 3.315   | 1,48 | 0.0749             | 35            | 0.868   | 1,29 | 0.3593             |
| Depressor EMG start to start of ballistic opening        | 52         | 4.964   | 3,47 | 0.0045             | 52          | 91.734  | 1,47 | <b>&lt;0.0001*</b> | 35            | 8.439   | 1,29 | 0.0070             |
| Depressor EMG end to start of ballistic opening          | 52         | 5.243   | 3,47 | 0.0033             | 52          | 1.120   | 1,47 | 0.2954             | 35            | 0.002   | 1,29 | 0.9636             |
| Depressor EMG max. amp. to start of ballistic opening    | 52         | 0.086   | 3,47 | 0.9674             | 52          | 20.159  | 1,47 | <b>&lt;0.0001*</b> | 35            | 0.590   | 1,29 | 0.4487             |
| Levator EMG (first burst) max. amp to end ballistic open | 52         | 1.590   | 3,47 | 0.2043             | 52          | 5.338   | 1,47 | 0.0253             | 35            | 0.306   | 1,29 | 0.5845             |
| Levator EMG (second burst) max. amp to mouth closed      | 53         | 6.371   | 3,48 | <b>0.0010*</b>     | 53          | 11.640  | 1,48 | <b>0.0013*</b>     | 35            | 0.011   | 1,29 | 0.9162             |

Table S2. Results of ANCOVA examining effects on kinematic, dynamic and electromyographic variables over the 20-35°C range in four *Bufo terrestris*. Prey distance was included as a covariate only when it showed a significant effect for that variable. Bold values with asterisks indicate significant effects at the Bonferroni-corrected alpha (0.0019 for 27 variables). Data from four individual toads were included in all analyses.

|                                                          | Individual |         |      |                    | Temperature |         |      |                    | Prey Distance |         |      |                    |
|----------------------------------------------------------|------------|---------|------|--------------------|-------------|---------|------|--------------------|---------------|---------|------|--------------------|
|                                                          | # Trials   | F-ratio | df   | P-value            | # Trials    | F-ratio | df   | P-value            | # Trials      | F-ratio | df   | P-value            |
| <b>Kinematic variables</b>                               |            |         |      |                    |             |         |      |                    |               |         |      |                    |
| Duration of ballistic mouth opening                      | 38         | 45.012  | 3,33 | <b>&lt;0.0001*</b> | 38          | 24.722  | 1,33 | <b>&lt;0.0001*</b> | 23            | 3.556   | 1,17 | 0.0765             |
| Duration of tongue projection                            | 38         | 10.853  | 3,33 | <b>&lt;0.0001*</b> | 38          | 1.324   | 1,33 | 0.2582             | 23            | 0.027   | 1,17 | 0.8717             |
| Gape distance at end of ballistic opening                | 23         | 3.552   | 3,18 | 0.0353             | 23          | 2.895   | 1,18 | 0.1061             | 22            | 1.541   | 1,16 | 0.2323             |
| Maximum tongue reach                                     | 23         | 7.660   | 3,17 | 0.0019             | 23          | 5.649   | 1,17 | 0.0295             | 23            | 42.591  | 1,17 | <b>&lt;0.0001*</b> |
| Duration of mouth opening during transport               | 38         | 3.959   | 3,33 | 0.0162             | 38          | 17.192  | 1,33 | <b>0.0002*</b>     | 23            | 0.432   | 1,17 | 0.5201             |
| Final gape distance                                      | 24         | 4.073   | 3,19 | 0.0216             | 24          | 28.035  | 1,19 | <b>&lt;0.0001*</b> | 24            | 1.204   | 1,18 | 0.287              |
| Duration of tongue retraction                            | 38         | 12.449  | 3,33 | <b>&lt;0.0001*</b> | 38          | 5.739   | 1,33 | 0.0224             | 23            | 1.161   | 1,17 | 0.2962             |
| Duration of mouth closing                                | 38         | 11.509  | 3,33 | <b>&lt;0.0001*</b> | 38          | 1.183   | 1,33 | 0.2846             | 23            | 3.847   | 1,17 | 0.0664             |
| <b>Dynamic variables</b>                                 |            |         |      |                    |             |         |      |                    |               |         |      |                    |
| Average velocity of ballistic mouth opening              | 24         | 5.586   | 3,19 | 0.0064             | 24          | 0.122   | 1,19 | 0.7305             | 23            | 5.939   | 1,17 | 0.0261             |
| Maximum velocity of ballistic opening                    | 23         | 75.977  | 3,18 | <b>&lt;0.0001*</b> | 23          | 2.573   | 1,18 | 0.1261             | 22            | 2.617   | 1,16 | 0.1253             |
| Maximum acceleration of ballistic opening                | 23         | 25.565  | 3,18 | <b>&lt;0.0001*</b> | 23          | 1.038   | 1,18 | 0.3219             | 22            | 0.167   | 1,16 | 0.688              |
| Maximum power of ballistic opening                       | 23         | 27.777  | 3,18 | <b>&lt;0.0001*</b> | 23          | 2.041   | 1,18 | 0.1702             | 22            | 0.393   | 1,16 | 0.5394             |
| Average velocity of tongue projection                    | 24         | 6.753   | 3,19 | 0.0027             | 24          | 6.985   | 1,19 | 0.0160             | 23            | 1.517   | 1,17 | 0.2348             |
| Average velocity of mouth opening during transport       | 22         | 0.403   | 3,17 | 0.7525             | 22          | 0.008   | 1,17 | 0.9304             | 22            | 0.072   | 1,16 | 0.7919             |
| Average velocity of tongue retraction                    | 24         | 4.122   | 3,19 | 0.0207             | 24          | 0.035   | 1,19 | 0.8545             | 23            | 2.544   | 1,17 | 0.1292             |
| Average velocity of mouth closing                        | 24         | 13.190  | 3,19 | <b>&lt;0.0001*</b> | 24          | 2.944   | 1,19 | 0.1025             | 24            | 3.025   | 1,18 | 0.0991             |
| <b>Electromyographic variables</b>                       |            |         |      |                    |             |         |      |                    |               |         |      |                    |
| Depressor EMG integrated area                            | 37         | 12.311  | 3,32 | <b>&lt;0.0001*</b> | 37          | 17.048  | 1,32 | <b>0.0002*</b>     | 22            | 2.002   | 1,16 | 0.1762             |
| Depressor EMG duration                                   | 37         | 7.316   | 3,32 | <b>0.0007*</b>     | 37          | 2.673   | 1,32 | 0.1119             | 22            | 5.646   | 1,16 | 0.0303             |
| Depressor EMG RMS                                        | 37         | 35.935  | 3,32 | <b>&lt;0.0001*</b> | 37          | 7.825   | 1,32 | 0.0086             | 22            | 0.214   | 1,16 | 0.6499             |
| Depressor EMG integrated area/duration                   | 37         | 30.517  | 3,32 | <b>&lt;0.0001*</b> | 37          | 6.227   | 1,32 | 0.0179             | 22            | 1.368   | 1,16 | 0.2593             |
| Depressor EMG RMS max. amplitude                         | 37         | 26.974  | 3,32 | <b>&lt;0.0001*</b> | 37          | 7.505   | 1,32 | 0.0100             | 22            | 0.192   | 1,16 | 0.667              |
| Levator EMG (second burst) RMS max. amplitude            | 37         | 56.100  | 3,32 | <b>&lt;0.0001*</b> | 37          | 4.743   | 1,32 | 0.0369             | 22            | 1.268   | 1,16 | 0.2768             |
| Depressor EMG start to start of ballistic opening        | 37         | 1.652   | 3,32 | 0.1970             | 37          | 5.408   | 1,32 | 0.0265             | 22            | 13.542  | 1,16 | 0.0020             |
| Depressor EMG end to start of ballistic opening          | 37         | 3.902   | 3,32 | 0.0175             | 37          | 3.136   | 1,32 | 0.0861             | 22            | 2.500   | 1,16 | 0.1334             |
| Depressor EMG max. amp. to start of ballistic opening    | 37         | 0.215   | 3,32 | 0.8851             | 37          | 0.286   | 1,32 | 0.5968             | 22            | 1.542   | 1,16 | 0.2322             |
| Levator EMG (first burst) max. amp to end ballistic open | 37         | 2.527   | 3,32 | 0.0749             | 37          | 0.100   | 1,32 | 0.7538             | 22            | 0.655   | 1,16 | 0.4303             |
| Levator EMG (second burst) max. amp to mouth closed      | 37         | 4.188   | 3,32 | 0.0131             | 37          | 0.041   | 1,32 | 0.8417             | 22            | 3.904   | 1,16 | 0.0657             |
